# Supplementary material for: Effect of locally tailored clinical guidelines on intrapartum management of severe hypertensive disorders at Zanzibar's tertiary hospital (the PartoMa study)
Source: PubMed Central journal article supplement — Int J Gynaecol Obstet. 2018 Oct 26;144(1):27–36. doi: 10.1002/ijgo.12692 (PMC7379925; doi:10.1002/ijgo.12692), 2018-10-26

# PartoMa Guidelines

## Partogram-Associated Labour Management Guidelines

---

Version 1.2

**The PartoMa Project**  
Department of Obstetrics &  
Gynaecology,  
Mnazi Mmoja Hospital

© 2015 The PartoMa Study, University of  
Copenhagen. All Rights Reserved.

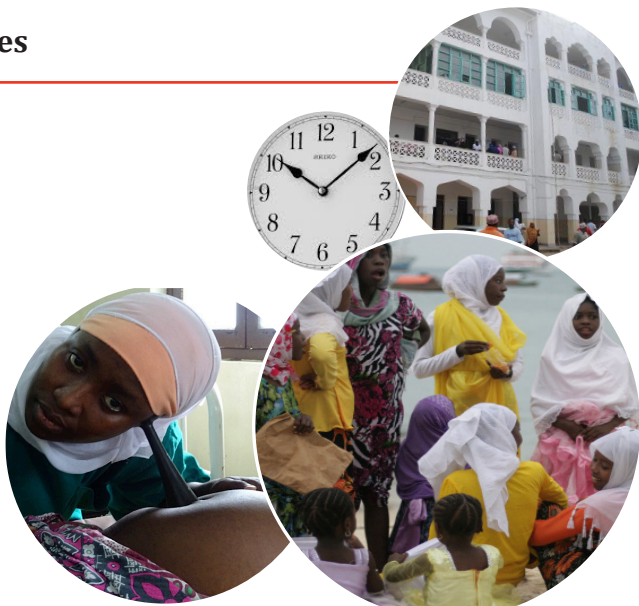

**INDEX - and example of a correctly used partogram**

**I. ROUTINE ASSESSMENTS & SUPPORTIVE CARE: Page 1 - 2**

**II. PARTOGRAM-ASSOCIATED MANAGEMENT: Page 3 - 6**

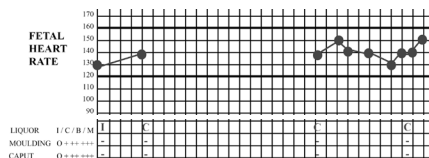

*Fetal heart rate & Liquor: Page 3*

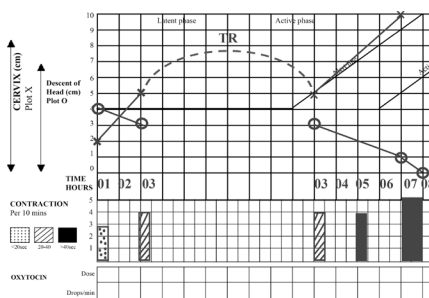

*Vaginal examination & contractions Page 4*

**COLOUR CODES**

**NORMAL:** Routine assessments & supportive care

**WARNING:** Attention & Treatment

**DANGER:** IMMEDIATE ACTION!

**REMEMBER**

The partogram must be used in the care for ALL women in labour (unless immediate need for intervention on admission)

The partogram is a decision support tool: Each assessment requires analysis of the partogram as a whole by

**3 DIAGNOSTIC QUESTIONS:**

1. Is **mother** in a good condition?
2. Is **baby** in a good condition?
3. Is **progress** normal?

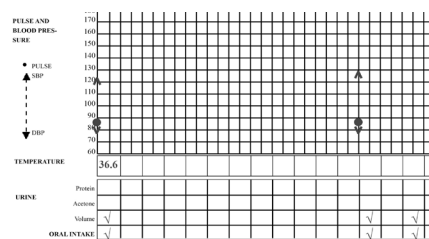

*High blood pressure & Proteinuria: Page 5*

*Low blood pressure, High pulse & High temperature Page 6*

If any of these is abnormal, consult with guidelines and/or a senior colleague

**!** The PartoMa guidelines represent the best possible management for the majority of patients, but there may be situations where alternative management is preferable. In such cases, treatment should be discussed with colleagues.

**III. CAESAREAN SECTION & VACUUM EXTRACTION: Page 7**

**ABBREVIATIONS**

- ARM, artificial rupture of membranes
- BP, blood pressure
- Bpm, beats per minute
- CPD, cephalopelvic disproportion
- CS, caesarean section
- DBP, diastolic blood pressure
- E.g., for example
- FHR, fetal heart rate
- GCS, Glasgow Coma Scale
- Hr., hour
- Im, intramuscular
- Iv, intravenous
- Mn., minutes
- MmHg, millimetres of mercury
- PROM, premature rupture of membranes
- RR, respiratory rate

- SBP, systolic blood pressure
- SRM, spontaneous rupture of membranes
- Temp, temperature
- TR, transfer
- UTI, urinary tract infection
- PV, per vaginal examination
- ≤, less than or equal to
- ≥, greater than or equal to

**REFERENCES**

**!** Adjustments have been made to reach best possible use at Mnazi Mmoja Hospital

World Health Organization's "Managing Complications in Pregnancy and Childbirth: A Guide for Midwives and Doctors" (2007) was used as the main fraim, but supplemented by evidence-based guidelines from Royal College of Obstetrics and Gynaecology, International Federation of Gynecology and Obstetrics, the Advanced Life-saving Skills in Obstetrics course, and the LIVKAN chart for pre-eclampsia/eclampsia, and the Safe Delivery App.

**UNCOMPLICATED LABOUR: ROUTINE ASSESSMENTS IN LATENT & ACTIVE PHASE**

When maternal vital signs, FHR and progress are normal

**ON ADMISSION**

**Obstetric history**

Previous and present pregnancy

**Initial assessments**

FHR Lie/presentation/descent  
Pulse, BP Contractions  
Temp PV

**Obstetric risks needing extra attention?**

E.g. maternal illness, previous CS, concerns for the baby, PROM, meconium stained liquor, vaginal bleeding, induction of labour

**LATENT PHASE**

Regular painful contractions & cervix < 4 cm

**Every 4 hrs. & when changes occur:**

(E.g. rupture of membranes or increasing contractions)

Pulse, BP

FHR \*

Abdominal exam

(lie/presentation?)

PV \*\*

Contractions \*\*\*

**FIRST STAGE, ACTIVE PHASE**

Cervix 4 - 9 cm \*\*\*\*

**Every ½ hr. (every 1 hr. as a minimum):**

FHR\*

**Every 2 hrs.:**

Contractions \*\*\*

Urine output (encourage bladder emptying spontaneously)

**Every 4 hrs.:**

PV \*\*

Pulse, BP

**SECOND STAGE, ACTIVE PHASE**

Cervix fully dilated

**Monitor FHR closely\*:**

Before pushing: Every 15 min.

When pushing: After every contraction

! Assure emptying bladder before starting to push and every ½ hr.

**Contractions & PV \*\*::**

Every ½ hr.

**Pulse & BP:** As in first stage of labour

**\* AUSCULTATION OF FHR**

Auscultate after a contraction for minimum 1 min.

Always assure that it is FHR and not maternal Pulse

**\*\* PV - What to assess?**

Cervical dilatation and state of cervix

(effacement, thin/thick, rigid/soft, oedematous)

Vagina (warm+moist/hot+dry)

State of membranes

Head descent (in relation to ischial spines or fifths of head palpable)

Colour of liquor if ruptured membranes

Presentation and position

Moulding & caput (if membranes are ruptured)

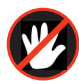

**! No PV if placenta praevia is suspected (page 3)**

**\*\*\*\* TRANSFER TO ACTIVE PHASE**

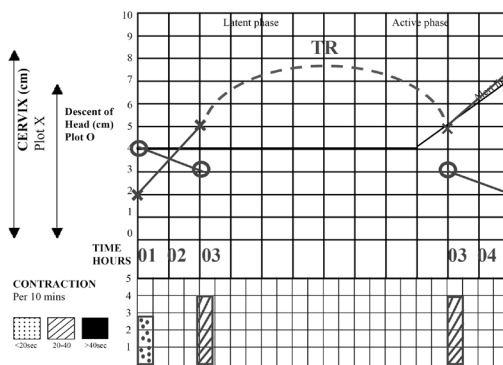

**! Active phase starts when cervix is 4 cm dilated**

**! If the patient is admitted in latent phase, when active phase starts, all observations must be transferred to the alert line (see also the partogram on page 0)**

**\*\*\* CONTRACTIONS**

Contractions are assessed by palpating the abdomen for 10 min. and carefully registering frequency and duration of each uterine tightening.

**! Strong contractions are 3-5 contractions per 10 min., each lasting more than 40 sec.**

CONTRACTIONS (per 10 min.)

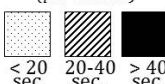

## UNCOMPLICATED BIRTH: ROUTINE POST-DELIVERY CARE

### AFTER DELIVERY OF BABY

Mother: **Active management of third stage**  
(*IM Oxytocin 10 units, controlled cord traction and uterine massage*)

Baby: **Apgar score \* (1 and 5 min.)**  
**Skin-to-skin contact**  
**Breastfeeding** (*within 30 min.*)

### AFTER DELIVERY OF PLACENTA

Mother: **Perineal/genital trauma?**  
**Placenta complete?**

### EVERY 15 MIN. IN THE FIRST 2 HRS.

*Every 30 min. as a minimum*

Mother: **General condition**  
**Uterine consistency**  
(*height of fundus*)  
**Vaginal blood loss**

Baby: **Breathing, colour & warmth**  
**Cord bleeding**  
(*teach mother to help assessing*)

### BEFORE DISCHARGE

Mother: **Pulse, BP, urination, vaginal discharge**

Baby: **Birth weight**

#### Give instructions:

1. Danger signs for mother & baby (fever, bleeding)
2. Information on any complications
3. Family planning

#### \* APGAR SCORE

|             | 0                          | 1                           | 2                   |
|-------------|----------------------------|-----------------------------|---------------------|
| Appearance  | Blue/pale all over         | Blue/pale limbs & pink body | Pink body & limbs   |
| Pulse       | Absent                     | < 100                       | ≥ 100               |
| Grimace     | No response to stimulation | Grimace when stimulated     | Cry when stimulated |
| Activity    | None                       | Some flexion                | All limbs flexed    |
| Respiration | Absent                     | Weak                        | Strong              |

## SUPPORTIVE CARE DURING LABOUR & DELIVERY

*Routine care for ALL women in labour*

1. Respect, empathy & caring support
2. Timely assessments, documentation & analyses of the partogram (*remember the 3 diagnostic questions, page 0*)
3. Clear, timely and supportive communication
4. Privacy and confidentiality
5. Cleanliness:
  - Strict hand washing before and after procedures
  - Gloves for all procedures, e.g. PVs
  - Wash hands before and after PV
  - Ensure cleanliness of birthing area & clean up spills immediately

**! Alcohol handrub is the best disinfectant**  
**! Do not share towels or soap**
6. Ambulation (position of woman's choice)
7. Urination  
(*encourage spontaneous bladder emptying every 2 hrs.*)
8. Eating and drinking freely

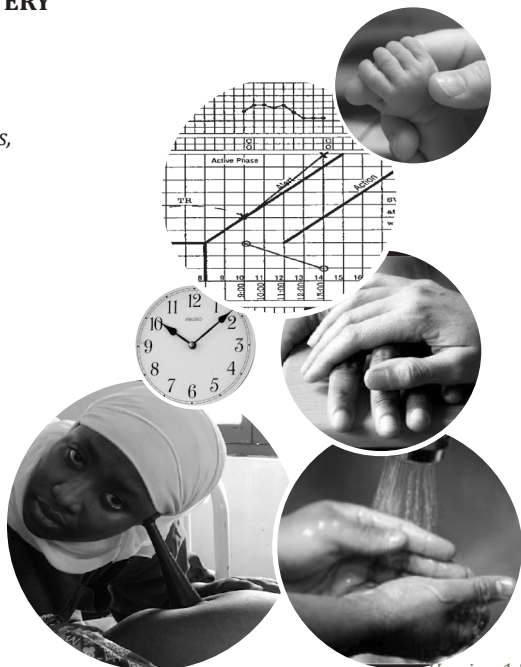

FETAL HEART RATE (FHR)

**Abnormal FHR (continuous FHR > 180 bpm)**

Suspect fetal distress and/or maternal infection: Pulse, BP, Temp (if fever, see page 6)

FHR 180 bpm Intrauterine resuscitation\*, FHR every 15 min.

If no improvement after 1 hr.: Fast delivery by vacuum extraction or CS (page 7)

**Non-reassuring FHR (continuous FHR 161-180 bpm)**

Assess Pulse, BP, Temp Intrauterine resuscitation\* FHR every 15 min.

**Normal FHR (FHR 120-160 bpm)**

First stage of active labour: FHR every 30 min.

Second stage of active labour: FHR every 15 min. when descending to pelvic floor  
FHR after every contraction when pushing

**Non-reassuring FHR (FHR 100-119 bpm)**

Intrauterine resuscitation\* FHR every 15 min. (to detect if FHR falls below 100 bpm)

**Fetal distress (FHR < 100 bpm)**

Intrauterine resuscitation\*

If no improvement to ≥ 100 bpm after 5 minutes: Fast delivery by vacuum extraction or CS (page 7)

If FHR not heard, see below \*\*

**LIQUOR (I/C/B/M)**

**Blood stained liquor / Antepartum bleeding**

Observe for signs of shock (page 6)

Cause of bleeding?:

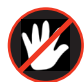

**! No PV until placenta praevia is ruled out by ultrasound, or in theatre with CS pack open and ready**

1. Abruptio placenta
2. Ruptured uterus
3. Placenta praevia
4. Vasa praevia
5. Other cause

**Meconium**

Can be a sign of fetal distress: Assess FHR and signs of obstruction (page 4)

**! At delivery: IMMEDIATE suctioning of baby's nose and mouth (before drying baby)**

**! Pushing is the most dangerous time for the baby: FHR after every contraction & constant attendance**

**! Always ensure that it is FHR, not maternal pulse**

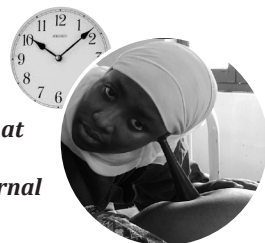

**\* INTRAUTERINE RESUSCITATION**

- Woman on left side (if no improvement, then right side)
- Stop oxytocin if administered
- Assess Pulse, BP, FHR, PV, Temp

**\*\* FHR NOT HEARD**

**Confirmation of absent FHR:**

- Ask colleague to reassess FHR (with Dopptone) & perform ultrasound

**Confirmed intrauterine fetal death:**

- Plan for vaginal birth:
  - Induction/augmentation of labour
  - Craniotomy (if obstructed labour)
  - Observe for signs of infection and treat (page 6)
  - Provide emotional support

**! CS only as last option or if severe maternal compromise**

**LATENT PHASE**

Regular painful contractions & cervical ripening (softening, effacing, opening), cervix < 4 cm

Assess every 4 hrs. if admitted (page 1-2)

Signs of infection? (PROM, UTI etc.)

Need for pain relief?

**! If prelabour rupture of membranes > 18 hrs., start antibiotics & plan for delivery (induction/augmentation)**

Latent phase > 12 hrs.:

Poor progress in latent phase? This might need ARM & oxytocin augmentation \*\*

**! Prolonged latent phase is often confused with false labour where contractions cease after a while (UTI?)**

**FIRST STAGE OF ACTIVE PHASE OF LABOUR**

Cervix ≥ 4 cm and regular painful contractions (how to assess PV and contractions, see page 1)

**! No PV if placenta praevia is suspected (page 3)**

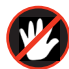

**Normal progress:**

Routine assessments & Supportive care (page 1-2)

Next PV after 4 hrs.

**Early detection of poor progress:**

Assess 5 Ps \*

Empty Bladder

If membranes intact: **ARM** (If HIV positive, wait till action line is crossed or cervix ≥ 8cm)

**IV Normal Saline or Ringer's Lactate 250 mL/hr. (If BP < 140/90)**

**Ambulation**

Next PV after 2 hrs.

.....4 hrs.....

**Severe poor progress:**

Assess 5 Ps \*

If not strong contractions 1 hr. after ARM & urination: **Oxytocin \*\*** PV every 2 hrs.

**Decide on CS if:**

- Progressive signs of obstruction (no further dilatation & descent, moulding +++ and positive FHR)
- No progress after 4 hrs. oxytocin
- Fetal or maternal compromise

**SECOND STAGE OF ACTIVE PHASE OF LABOUR** Cervix fully dilated

**! EVEN IF POOR PROGRESS IN FIRST STAGE, PROGRESS IN SECOND STAGE STARTS IN GREEN ZONE**

**≤ 1 hr. and pushing ≤ 30 min.**

Supportive / encouraging care

**! Never leave the woman alone in second stage & monitor FHR closely (page 3)**

**1-2 hrs and/or pushing 30-60 min.**

Exclude malposition

Consider augmentation: (if presenting part not visible at vulva)

- ARM & Oxytocin \*\*
- IV Normal Saline or Ringer's Lactate 250 mL/hr (if BP < 140/90)

PV every 15-30 min.

**> 2 hrs and/or pushing > 1 hr.**

Vacuum extraction (page 7) (if bony part of fetal head at or below ischial spines)

CS as last resort

**! Always stop Oxytocin infusion when deciding on CS**

**\* 5 Ps - why poor progress of labour?**

**Power:**

If < 4 strong contractions /10 min., augment: ARM, IV fluid, ambulation, oxytocin \*\* (see specific instructions above)

**Passenger:**

- Malposition/malpresentation? (if yes, vaginal delivery possible?)

**Pass urine:**

- Encourage spontaneous emptying every 2 hrs.
- Catheterize as last resort

**Psyche:**

- Encourage, reassure, reduce anxiety

**Pelvis:**

True CPD may be considered when failed trial of augmentation

**\*\* OXYTOCIN AUGMENTATION**

**Indication:** Severe poor progress of labour and < 4 strong contractions /10 min.

**Start dose:** Oxytocin 2.5 units in 500 ml Normal Saline or Ringer's Lactate at 10 drops/min.

**Every 15 min.:** Carefully count FHR, contractions, oxytocin drops per min.

**Every 30 min.:** Increase infusion rate by 5 drops/min. half hourly until 4-5 strong contractions/10 min. Maximum 60 drops/min. Maintain this rate until delivery.

**! NEVER > 5 CONTRACTIONS per 10 MIN. If hyperstimulation, stop oxytocin.**

## HYPERTENSION &amp; PRE-ECLAMPSIA / ECLAMPSIA

! THESE GUIDELINES ONLY INVOLVE TREATMENT DURING LABOUR AND DELIVERY

▲ SBP ≥ 160  
and/or  
DBP ≥ 110  
▼ (mmHg)

**SEVERE Hypertension / Pre-eclampsia:****Medication (SLOWLY):**

Anticonvulsant \* &amp; Antihypertensive \*\*

**Assess every 30 min.** (use the specific observation sheets):

- Pulse, BP, RR, Temp, FHR, GCS

**Symptoms of organ failure \*\*\* or****Magnesium Sulphate toxicity \*\*?**

Ask patient and assess lungs, urine output, urine dipstick, patellar reflexes

**Strict fluid balance:**

- Catheterize bladder (fluid intake &amp; output, proteinuria)

- If urine output &lt;30mL/hr.: IV Ringer's Lactate 1L in 8 hrs

**Plan for delivery within 12 hrs. of admission** (if at all possible, vaginal delivery is preferable)**Convulsions (eclampsia):**! *Treat as eclampsia until other diagnosis is confirmed*

1. Shout for help
2. Airways and breathing
3. Position on left side and protect from injuries
4. Insert IV lines
5. Start Magnesium Sulphate SLOWLY \*
6. Oxygen by mask / nasally

Additional management as for severe pre-eclampsia

▲ SBP 140-159  
and/or  
DBP 90-109  
▼ (mmHg)

**MILD-MODERATE Hypertension / Pre-eclampsia:**

Ask &amp; observe for symptoms of organ failure \*\*\*

Assess lungs, urine output, proteinuria, patellar reflexes

Reassess Pulse &amp; BP every hr. FHR every 30 min.

! *For pre-eclampsia and eclampsia, specific observation & treatment sheets must be used in combination with the partogram*

▲ SBP 100-139  
and/or  
DBP 60-89  
▼ (mmHg)

**NORMAL**

BP every 4 hrs.

(for other routine assessments, see page 1)

**\* ANTICONVULSANT****MAGNESIUM SULPHATE (50%):****Loading dose:**IV 4 g in 250 mL Normal Saline **SLOWLY** over 15 min.

IM 5 g + 1 mL 2% Lignocaine in each buttock

**Maintenance dose:**

IM 5g + 1mL 2% Lignocaine every 4 hrs, alternate buttocks

**Check for toxicity and DO NOT repeat dose if:**

RR &lt; 16/min.

Urinary output &lt; 30 ml/hr.

Patellar reflexes diminished or absent

**Antidote:**

IV Calcium Gluconate 1 gram (10mL in 10% solution) over 10 min.

**Duration:**

Continue maintenance dose for 24 hrs. after delivery or last convulsion, whichever occurs last

**\*\* ANTIHYPERTENSIVE****HYDRALAZINE:**IV 5 mg **SLOWLY** over 10 min.

Repeat 5mg every 20 min. until SBP &lt; 160 mmHg

! **DBP should not fall below 90 mmHg**! **Observe closely:** Hydralazine may cause maternal hypotension and fetal distress**\*\*\* DIAGNOSING PRE-ECLAMPSIA****MILD-MODERATE pre-eclampsia:**

Hypertension on two consecutive readings AND Proteinuria ≥ ++

**SEVERE pre-eclampsia:**

Pre-eclampsia AND

Severe hypertension OR

Symptoms of organ failure:

- Headache (*persistent & severe*)
- Blurred vision
- Upper abdominal pain (*persistent*)
- Decreased urine production (< 30 ml/hr)
- Breathlessness (*pulmonary oedema*)

**LOW BLOOD PRESSURE (BP) OR LOW/HIGH PULSE**

▲ SBP < 100 (mmHg)  
▼

● or  
Pulse < 60 bpm  
or Pulse > 110 bpm  
(also see below)

**Immediate danger signs?:**  
- SBP < 90 (*SHOCK*)  
- **Unconscious** (if convulsions, see page 5)  
- **Cardiac arrest** (*START CARDIAC MASSAGE & VENTILATION*)

**Elevate legs**

**Vital signs every 15 min.:**  
Pulse, BP, RR, temp, PV, blood loss, FHR, urine output

**Oxygen** (by mask / nasal cannulae)

**Collect blood**  
Haemoglobin, blood group, cross-match and clotting-test

**Insert IV lines** (*wide bore cannula*):  
IV Normal Saline or Ringer's Lactate 2L in 20-40 min.

**Catheterize bladder** (*fluid intake and output*)

**Determine & manage cause:**  
1. bleeding            4. cardiac  
2. sepsis              5. other  
3. trauma

**HIGH PULSE (P)**

● Pulse > 100  
OR FHR > 160

**Consider maternal infection, dehydration or bleeding?**  
- Pulse, BP, RR, Temp, FHR every 15-30 min.  
- Uterine pain?  
- PV (*blood loss, foulsmelling vaginal discharge*)  
- Sufficient fluid intake?

**If P > 110: SUSPECT SHOCK** (*see above*)

**HIGH TEMPERATURE (Temp)**

**Temp ≥ 38°C = FEVER**

**Antibiotics until delivery:**  
For example (*if not allergic*):  
Ampicillin 2g IV /6 hours AND Gentamicin 5 mg/kg IV /24 hrs.

**Tablet Paracetamol** 1 gram every 6 hrs.

**Consider diagnosis & order relevant laboratory tests:**  
UTI, Chorioamnionitis, Malaria, Sepsis  
(remember to adjust treatment accordingly)

**Plan for delivery within 12 hrs.**  
(*If latent phase, augment labour, page 4*)

**Measure Pulse, BP, RR, FHR every 15-30 min. Measure Temp hourly**



**EMERGENCY CS - a few notes**

**Contraindications for CS:**

If the woman is medically unstable (e.g. severe hypertension), it is recommended that the maternal condition is stabilized first, and delivery considered only for obstetric indications.

**Maximum time from deciding on emergency CS to delivery:**

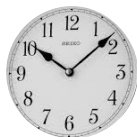

**If fetal or maternal compromise: 30 minutes**

*(E.g. fetal distress, cord prolapse with pulsating cord, severe antepartum haemorrhage, maternal medical condition)*

**If no maternal or fetal compromise, but early delivery is needed: 75 minutes**

*(E.g. poor progress in active labour, 2 times previous lower segment CS, placenta praevia)*

**VACUUM EXTRACTION**

*This section is reproduced with permission from ALSO guidelines pocket booklet, issue of Continuing Medical Education. Copyright: © American Academy of Family Physicians. All Rights Reserved.*

**Most important indications:**

- Fetal distress (page 3)
- Poor progress in second stage of labour (page 4)

**Required beforehand:**

1. Cervix fully dilated
2. Cephalic presentation, membranes ruptured
2. Fetal head at or below ischial spines (level 1/5 or 0/5)
3. Gestational age 34 weeks or more
4. Birth attendant trained in vacuum extraction

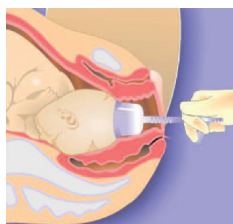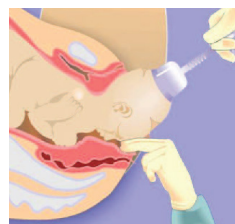

**The A-J approach to vacuum extraction:**

- A** Ask for help  
Address the patient  
*(inform that you need patient to cooperate and keep pushing when there is contraction)*  
Abdominal Palpation *(descent of head)*
- B** Bladder empty?
- C** Cervix must be fully dilated  
Contractions are needed *(oxytocin needed? Page 4)*
- D** Determine position of the head  
*(locate the posterior triangular fontanel)*
- E** Equipment ready?  
*(delivery tray, towels, neonatal resuscitator, vacuum extractor)*
- F** Flexion point must be located  
*(place the edge of the cup at the tip of the posterior triangular fontanel)*  
Feel for vaginal tissue between cup and fetal skull to avoid perineal trauma  
*(before and after applying suction)*
- G** Gentle, steady traction with no rocking during contractions  
*(first contractions downward traction, during following contractions more upward)*
- H** HALT traction between contractions  
HALT and abandon if 3 pop-offs  
HALT if 3 pulls with no progress  
HALT after 20 min. of use (if delivery not achieved)
- I** Intact perineum! When head is delivered, protect perineum with one hand  
*(incision is only rarely needed)*
- J** When the Jaw is reachable, release vacuum and remove cup

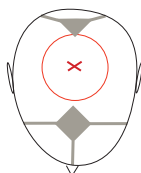

**! If the procedure is not possible or fails, CS should be performed immediately**

**! Compared to spontaneous vaginal birth, vacuum extraction has increased risk of perineal trauma and minor trauma to the head of the baby**

### **Guidelines development team:**

Nanna Maaløe, Tarek Meguid, Birgitte Bruun Nielsen, Jos van Roosmalen

### **Internal review:**

The guidelines were reviewed twice at Mnazi Mmoja Hospital; first by six nurse-midwives and doctors, and secondly by a 4 weeks pilot testing and evaluation by 32 birth attendants.

### **External peer-review:**

The PartoMa guidelines are peer-reviewed by seven international experts specialized in midwifery/obstetrics.

### **Continual adjustments to reach reality in the best possible way:**

Suggestions for improvements are always welcome. Thank you to the entire group of birth attendants at Mnazi Mmoja Hospital who have helped adjusting the guidelines during the first year.

### **More information on the PartoMa study:**

[publichealth.ku.dk/sections/global/project/partoma/](http://publichealth.ku.dk/sections/global/project/partoma/)

© 2015 The PartoMa Study, University of Copenhagen. All Rights Reserved.  
Requests for permission to reproduce or translate should be addressed by email to: [techtrans@adm.ku.dk](mailto:techtrans@adm.ku.dk).

All reasonable precautions have been taken by the PartoMa study team to verify the information contained in this publication, and both text and graphical presentations are internationally peer-reviewed. The PartoMa guidelines are primarily developed to guide the health providers to the best possible care in the low resourced referral hospital of Zanzibar, Mnazi Mmoja Hospital. The material is being distributed without warranty of any kind, and the responsibility for the interpretation and use of the material lies with the reader.

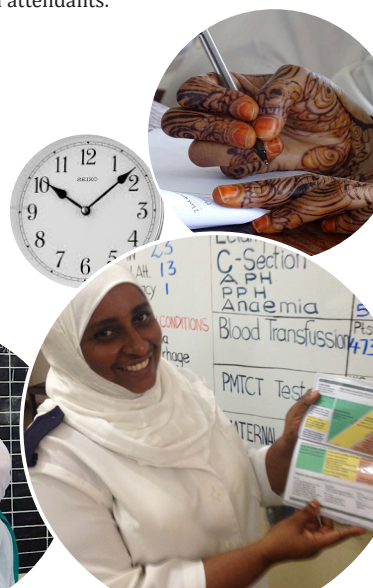

Supplement: IJGO-144-27-s003.pdf [file IJGO-144-27-s003.pdf]
